# Supplementary material for: Tumor-Derived Exosomal Protein Tyrosine Phosphatase Receptor Type O Polarizes Macrophage to Suppress Breast Tumor Cell Invasion and Migration
Source: PubMed Central journal article supplement (PMC8505750; doi:10.3389/fcell.2021.703537), 2021-09-28
Supplement: Data_Sheet_1.pdf [file Data_Sheet_1.pdf]

## **Supplementary information**

### **Supplementary Materials and Methods**

#### **Immune Score Analysis for the Microenvironment**

To assess the possible association of immune score with PTPRO expression in human primary breast cancer, two expression cohorts from primary breast tumors were obtained from the Gene Expression Omnibus (GEO) database (n = 256 for GSE36774, n = 97 for GSE81954). The immune score was calculated by using the ESTIMATE algorithm to the expression matrix (1). Furthermore, the cases were assigned to high and low PTPRO expression groups based on the median value of PTPRO expression values, to identify the possible association of immune score with PTPRO expression.

#### **Gene Set Enrichment Analyses**

To further explore the potential relationship between PTPRO expression with organism immune, the mRNA profiles of primary breast cancer from GSE36774 (n = 256) and GSE81954 (n = 97) were processed and subjected to the Gene Set Enrichment Analyses (GSEA) (2), using GSEA software (version 4.1.0). Next, to verify the relationship between STAT3, STAT6 expression with macrophage polarization, the mRNA profiles of primary breast cancer from GSE82173 were processed to GSEA.

#### **TIMER Database Analysis**

## Exosomal PTPRO suppresses tumor invasion

The correlation of PTPRO expression with the abundance of macrophages infiltrating in breast cancer was analyzed in Tumor Immune Estimation Resource (TIMER; [cistrome.shinyapps.io/timer](http://cistrome.shinyapps.io/timer)) (3).

### **Analysis of the Relative Proportions of Macrophages (M0, M1, M2) in Breast Cancer**

Macrophages in breast cancer samples from the GEO cohort (GSE36774, GSE81954) were assessed by using the CIBERSORT deconvolution algorithm. The gene expression matrix of macrophages was performed from the CIBERSORT platform (<https://cibersortx.stanford.edu/>). The results of the inferred proportions of macrophages assessed by CIBERSORT were considered to be accurate at a threshold of  $P < 0.05$  (4). Consequently, only samples with a CIBERSORT  $P < 0.05$  were qualified for further analysis. Furthermore, the number of permutations of the default signature matrix was set to 100.

## Reference

1. Yoshihara K, Shahmoradgoli M, Martinez E, Vegesna R, Kim H, Torres-Garcia W *et al*: Inferring tumour purity and stromal and immune cell admixture from expression data. *Nat Commun* (2013) 4:2612. doi: 10.1038/ncomms3612
2. Subramanian A, Tamayo P, Mootha VK, Mukherjee S, Ebert BL, Gillette MA *et al*: Gene set enrichment analysis: a knowledge-based approach for interpreting genome-wide expression profiles. *Proc Natl Acad Sci U S A* (2005) 102(43):15545-15550. doi: 10.1073/pnas.0506580102
3. Li T, Fan J, Wang B, Traugh N, Chen Q, Liu JS, Li B, Liu XS: TIMER: A Web Server for Comprehensive Analysis of Tumor-Infiltrating Immune Cells. *Cancer Res* (2017) 77(21):e108-e110. doi: 10.1158/0008-5472.CAN-17-0307
4. Ali HR, Chlon L, Pharoah PD, Markowitz F, Caldas C: Patterns of Immune Infiltration in Breast Cancer and Their Clinical Implications: A Gene-Expression-Based Retrospective Study. *PLoS Med* (2016) 13(12):e1002194. doi: 10.1371/journal.pmed.1002194

**Supplementary Table****Supplementary Table S1.** Antibodies used in this study

| Antibody       | Application | Dilution | Host      | Source                             | Cat. #     |
|----------------|-------------|----------|-----------|------------------------------------|------------|
| iNOS           | IF          | 1:100    | Rabbit Ab | Abcam, Cambridge, UK               | ab15323    |
| CD206          | IF          | 1:2000   | Rabbit Ab | Abcam, Cambridge, UK               | ab64693    |
| Alix           | WB          | 1:1000   | Rabbit Ab | Cell Signaling Technology, MA, USA | ab117600   |
| TSG101         | WB          | 1:1000   | Rabbit Ab | Abcam, Cambridge, UK               | ab133586   |
| CD63           | WB          | 1:1000   | Rabbit Ab | Abcam, Cambridge, UK               | ab134045   |
| CD9            | WB          | 1:1000   | Rabbit Ab | Abcam, Cambridge, UK               | ab223052   |
| Calnexin       | WB          | 1:1000   | Rabbit Ab | Cell Signaling Technology, MA, USA | #2433      |
| PTPRO          | WB          | 1:500    | Rabbit Ab | Proteintech Group Inc, USA         | 12161-1-AP |
| p-STAT3        | WB          | 1:1000   | Rabbit Ab | Cell Signaling Technology, MA, USA | #9145      |
| STAT3          | WB          | 1:1000   | Mouse Ab  | Cell Signaling Technology, MA, USA | #9139      |
| p-STAT6        | WB          | 1:1000   | Rabbit Ab | Cell Signaling Technology, MA, USA | #9361      |
| STAT6          | WB          | 1:1000   | Rabbit Ab | Cell Signaling Technology, MA, USA | #9362      |
| $\beta$ -actin | WB          | 1:2000   | Rabbit Ab | Proteintech, Rosemont, USA         | #4967      |

## Supplementary Figures and Figure legends

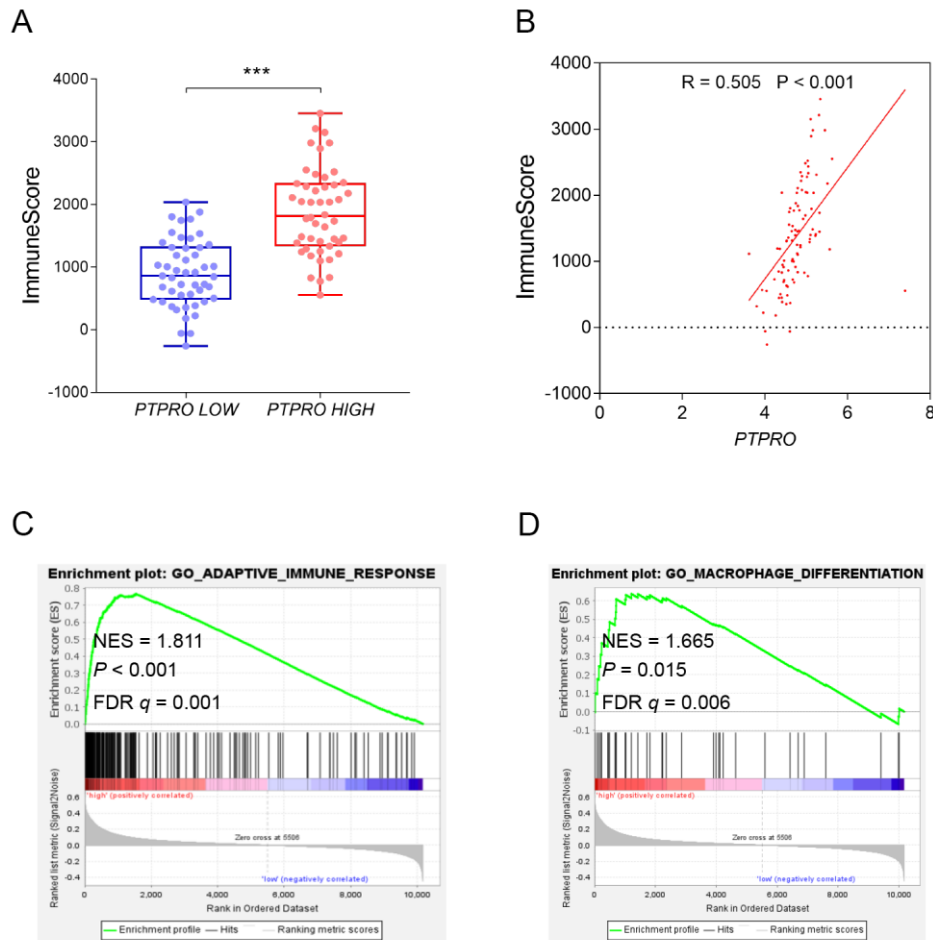

**Figure S1. PTPRO expression was associated with immune infiltration in breast cancer.** (A) Box and scatter plots showing the immune scores of PTPRO high expression group and PTPRO low expression group in the GEO dataset GSE81954. (B) Correlation between PTPRO expression and immune scores in the GEO dataset GSE81954. (C) GSEA showing the positive correlation between PTPRO expression and adaptive immune response signature in the GEO dataset GSE82173. (D) GSEA showing the positive correlation between PTPRO expression and macrophage differentiation-related gene signature in the GEO dataset GSE82173. FDR  $q$ ,

## Exosomal PTPRO suppresses tumor invasion

false-discovery rate  $q$  value; NES, normalized enrichment score; \*\*\* $P < 0.001$  by Student's  $t$ -test.

## Exosomal PTPRO suppresses tumor invasion

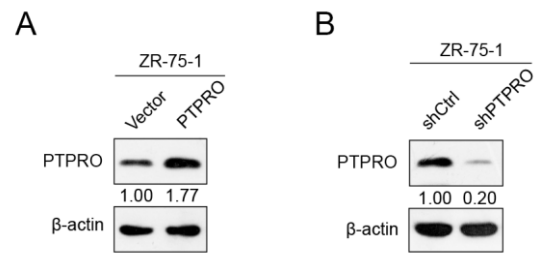

**Figure S2. PTPRO expression in ZR-75-1 cells.** (A) Immunoblotting revealed that PTPRO was efficiently over-expressed in ZR-75-1 cells. Relative PTPRO protein expression was normalized to  $\beta$ -actin. (B) Immunoblotting revealed that PTPRO was efficiently knockdown in ZR-75-1 cells. Relative PTPRO protein expression was normalized to  $\beta$ -actin.

## Exosomal PTPRO suppresses tumor invasion

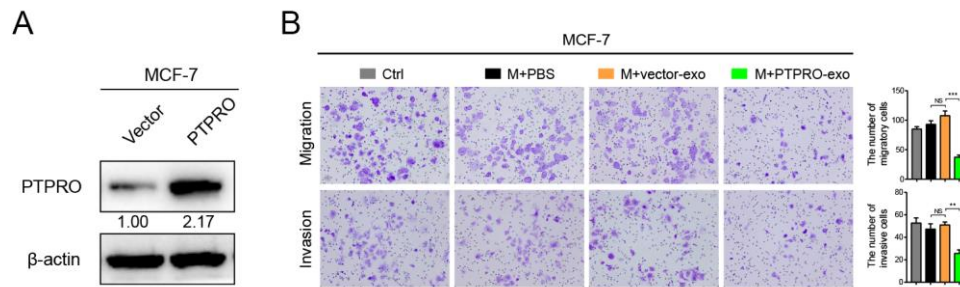

### Figure S3. Tumor cell-derived exosomal PTPRO inhibited MCF-7 cells invasion

### and migration. (A) Immunoblotting revealed that PTPRO was efficiently

over-expressed in MCF-7 cells. Relative PTPRO protein expression was normalized

to  $\beta$ -actin. (B) Cell migration and invasion assays were used to study the migration

and invasion ability of MCF-7 cells. Original magnification: 200 $\times$ . Error bars, SEM.

\*\* $P$  <0.01; \*\*\* $P$  <0.001 by a one-way ANOVA with post hoc intergroup

comparisons.



## Exosomal PTPRO suppresses tumor invasion

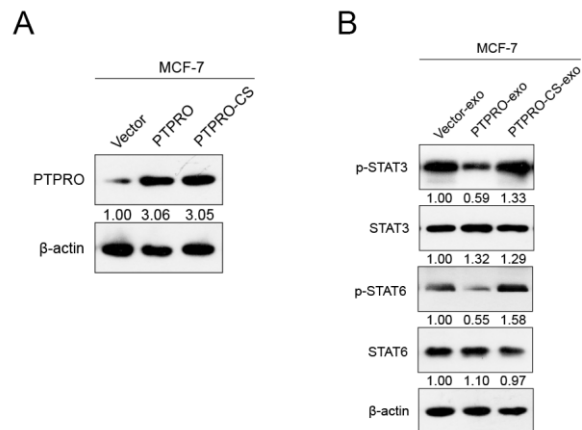

**Figure S4. Tumor cell-derived exosomal PTPRO dephosphorylated STAT3/STAT6 signaling.** (A) Immunoblotting revealed that PTPRO was efficiently over-expressed in MCF-7 cells and the mutation of PTPRO did not affect its protein expression level. Relative PTPRO protein expression was normalized to  $\beta$ -actin. (B) The expressions of STAT3/STAT6 protein and corresponding phosphorylated protein were measured by immunoblotting in THP-1 derived macrophages after treating with MCF-7-vector-exo, MCF-7-PTPRO-exo or MCF-7-PTPRO-CS-exo.
